1  
2  
3  
4  
5  
6  
7  
8  
9  
10  
11  
12  
13  
14  
15  
16

**Competition between mobile genetic elements drives optimization of a phage-encoded  
CRISPR-Cas system: Insights from a natural arms-race**

**Amelia C. McKitterick<sup>1</sup>, Kristen N. LeGault<sup>1</sup>, Angus Angermeyer<sup>1</sup>, Muniral Alam<sup>2</sup>, and  
Kimberley D. Seed<sup>1,3</sup>**

<sup>1</sup>Department of Plant and Microbial Biology, University of California, Berkeley, 111 Koshland  
Hall, Berkeley, CA 94720, USA

<sup>2</sup> International Centre for Diarrhoeal Disease Research, Bangladesh, Dhaka, Bangladesh

<sup>3</sup> Chan Zuckerberg Biohub, San Francisco, CA 94158, USA

Correspondence should be addressed to Kimberley D. Seed (email: [kseed@berkeley.edu](mailto:kseed@berkeley.edu)),

ORCID ID KDS, 0000-0002-0139-1600

Keywords: CRISPR, phage, mobile genetic elements, cholera

## 17 **Abstract**

18 CRISPR-Cas systems function as adaptive immune systems by acquiring nucleotide sequences  
19 called spacers that mediate sequence-specific defense against competitors. Uniquely, the  
20 phage ICP1 encodes a Type I-F CRISPR-Cas system that is deployed to target and overcome  
21 PLE, a mobile genetic element with anti-phage activity in *Vibrio cholerae*. Here, we exploit the  
22 arms race between ICP1 and PLE to examine spacer acquisition and interference under  
23 laboratory conditions to reconcile findings from wild populations. Natural ICP1 isolates encode  
24 multiple spacers directed against PLE, but we find that single spacers do not equally interfere  
25 with PLE mobilization. High-throughput sequencing to assay spacer acquisition reveals that  
26 ICP1 can also acquire spacers that target the *V. cholerae* chromosome. We find that targeting  
27 the *V. cholerae* chromosome proximal to PLE is sufficient to block PLE and propose a model in  
28 which indirect chromosomal spacers are able to circumvent PLE by Cas2-3-mediated  
29 processive degradation of the *V. cholerae* chromosome before PLE mobilization. Generally,  
30 laboratory acquired spacers are much more diverse than the subset of spacers maintained by  
31 ICP1 in nature, showing how evolutionary pressures can constrain CRISPR-Cas targeting in  
32 ways that are often not appreciated through *in vitro* analyses.

33

## 34 **Introduction**

35 Phages often vastly outnumber their bacterial hosts in a variety of environments (1). As  
36 such, bacteria have evolved numerous mechanisms for phage defense, including adaptive  
37 immunity via clustered regularly interspaced short palindromic repeats (CRISPR) and CRISPR-  
38 associated (Cas) proteins (2,3). CRISPR-Cas systems are composed of a CRISPR array—a  
39 series of “spacers” of foreign sequence alternating with repeats that are transcribed into  
40 CRISPR RNAs (crRNAs)—and CRISPR-associated (Cas) genes. Together with crRNAs, Cas  
41 proteins defend against foreign nucleic acids, such as the genome of an infecting phage,  
42 through a three-step process: adaptation, crRNA expression, and interference. During

43 adaptation, a foreign DNA fragment is incorporated into the CRISPR array to provide a  
44 molecular memory of the challenges that the host cell has faced. This CRISPR array is  
45 expressed and processed into individual crRNAs, which complex with Cas proteins and survey  
46 the cell for complementary invading nucleotides. Upon finding a complementary sequence,  
47 termed protospacer, a Cas nuclease is recruited to the site to mediate interference by cleaving  
48 the substrate, ultimately leading to the destruction of the invader (4,3). Across CRISPR-Cas  
49 containing bacteria and archaea, Class 1 Type I CRISPR-Cas systems employing a Cas3  
50 enzyme for DNA unwinding and degradation (5), are the most prevalent (6).

51 CRISPR-Cas systems do not discriminate between horizontally acquired traits based on  
52 fitness gain or loss. Hence, CRISPR-Cas systems are equally capable of halting harmful  
53 invading phage DNA as they are halting beneficial mobile genetic elements, including those  
54 encoding antibiotic resistance and pathogenicity genes (7–9). As such, some pathogens only  
55 have alternative anti-phage defense systems (10). For example, the currently circulating biotype  
56 of epidemic *Vibrio cholerae*, the causative agent of the diarrheal disease cholera, does not rely  
57 on CRISPR-Cas for phage defense (11). Instead, *V. cholerae* evolved to use phage inducible  
58 chromosomal island-like elements (PLEs) to defend against the prevalent lytic phage, ICP1  
59 (12). PLEs are mobile genetic elements that reside integrated in the small chromosome  
60 (chromosome II) of *V. cholerae* (12). During ICP1 infection of PLE(+) *V. cholerae*, PLE excises  
61 from the host chromosome, replicates to high copy and is horizontally transduced to naïve  
62 neighboring cells, all the while inhibiting phage replication through unknown mechanisms (Fig.  
63 1).

64 In order to overcome the anti-phage activity encoded by *V. cholerae* PLE, some ICP1  
65 isolates use a Type I-F CRISPR-Cas system that directly targets PLE (Fig. 1), making the  
66 CRISPR-Cas system essential for the phage to form plaques on PLE(+) *V. cholerae* (13). Type  
67 I-F systems are composed of three Csy proteins that make up the Csy complex along with  
68 Cas6f, a protein involved in crRNA processing (14). This complex interacts with the processed

69 crRNA to search DNA for a complementary protospacer with an appropriate self versus non-self  
70 discrimination sequence, known as the protospacer adjacent motif (PAM) (15). Upon finding a  
71 match with an appropriate PAM, the trans-acting Cas2-3 fusion protein is recruited to degrade  
72 the target DNA. In addition to exonuclease activity, Cas2-3 is a processive helicase *in vitro*,  
73 allowing for continued degradation of the target DNA (16,17). Recently, sequence analysis  
74 identified phages that are predicted to encode CRISPR arrays and/or Cas genes (18,19);  
75 however, ICP1 is the only phage shown to encode a fully functional CRISPR-Cas system  
76 (12,13).

77 As is true when CRISPR-Cas is harnessed by a prokaryotic host for genome defense,  
78 the ICP1-encoded CRISPR-Cas system is tasked with targeting and degrading a hostile mobile  
79 genetic element. However, there are additional challenges associated with a phage encoding  
80 and relying on CRISPR-Cas for its own survival. The ICP1 infection cycle occurs over a 20  
81 minute period, and current data suggest that ICP1 synthesizes its CRISPR-Cas machinery *de*  
82 *novo* upon infection of *V. cholerae* (13). PLE is induced to excise within minutes of infection  
83 through interactions with an early phage-encoded gene product (20). Thus, in order to  
84 overcome PLE, CRISPR synthesis and interference must outpace a rapidly replicating target.

85 ICP1 and *V. cholerae* are consistently co-isolated from patient stool samples in regions  
86 where cholera is endemic such as Bangladesh (12,21,22). Five genetically distinct PLE variants  
87 in *V. cholerae* have appeared in temporally discrete waves across cholera epidemics (12).  
88 Previous analysis revealed that ICP1-encoded CRISPR-Cas can adapt and acquire new  
89 spacers against PLE under laboratory conditions (13), however the rules governing spacer  
90 acquisition and targeting efficacy for this system are not known. Further, recent comparative  
91 genomics of 18 ICP1 isolates collected from Bangladesh between 2001-2012 found that 50%  
92 carry CRISPR-Cas (23), however the contemporary state of circulating ICP1 and *V. cholerae*  
93 PLE in the region are not known.

94 Here, we provide an up-to-date understanding of the genomic variants of ICP1 and PLE  
95 circulating in Bangladesh. We find that natural ICP1 isolates encode multiple anti-PLE spacers  
96 and experimentally validate that increased PLE targeting by ICP1 is required to fully abolish  
97 PLE mobilization. Significantly, using a high-throughput spacer acquisition assay and  
98 experimental validation, we show that noncanonical PAMs and indirect protospacers in the *V.*  
99 *cholerae* small chromosome can unexpectedly provide protection against PLE. Our results  
100 support a model in which ICP1-encoded CRISPR-Cas that is directed against the *V. cholerae*  
101 small chromosome is in a race to reach PLE before it excises from the chromosome to exert its  
102 anti-phage activity. Taken together, our study highlights the differences between interference  
103 competent spacers under laboratory conditions and those that are selected for in nature to  
104 provide mechanistic insight into the evolutionary pressures governing the interactions between  
105 epidemic *V. cholerae* and its longstanding battle with the predatory phage ICP1.

106

## 107 **Methods.**

### 108 **Strains, growth conditions and genomic analysis.**

109 Phage, bacterial strains and plasmids used in this study are listed in Supplementary Tables 1-3.  
110 Bacteria were routinely grown at 37 °C on lysogeny broth (LB) agar or in LB broth with aeration.  
111 Media was supplemented with ampicillin (50 µg/ml), kanamycin (75 µg/ml), spectinomycin (100  
112 µg/ml), and/or streptomycin (100 µg/ml) when appropriate. Phage susceptibility was determined  
113 by standard soft agar overlays as described (11) and phage plaque spot plates were performed  
114 as described previously (20). Cholera stool samples collected and stored at the ICDDR,B  
115 between 2015-2017 were probed for the presence of phage by standard soft agar overlays, and  
116 *V. cholerae* isolates were recovered by plating on Thiosulfate Citrate Bile Salts Sucrose  
117 selective media (Difco). ICP1 specific primers (13,22) and PLE specific primers (Supplementary  
118 Table 4) were used for preliminary screening of isolates from stool samples. The presence of  
119 CRISPR-Cas in ICP1 and PLE in *V. cholerae* was validated by whole genome sequencing.

120 Genomic libraries were generated using NEBNext Ultra II DNA Library preparation kit for  
121 Illumina (New England Biolabs), according to the manufacturer's recommended protocols.  
122 Paired-end sequencing (2 × 150 bp) was performed on an Illumina HiSeq4000 (University of  
123 California, Berkeley QB3 Core Facility). Sequencing assembly/mapping and detection of  
124 CRISPR was performed as described (23). The *V. cholerae* clinical isolate KDS1 genome was  
125 sequenced on Illumina HiSeq4000, PacBio Sequel and Oxford Nanopore MinION sequencers  
126 (University of California, Berkeley QB3 Core Facility). Assembly of KDS1 sequences was  
127 performed using the canu assembler v1.6 (24) to combine the PacBio and Oxford Nanopore  
128 reads into genomic scaffolds for the large and small chromosomes using default settings and an  
129 expected genome size of 4033460bp. This generated two scaffolds of the expected sizes for  
130 each chromosome which were then polished with the Illumina paired-end sequences using Pilon  
131 v1.22 (25) with the “fix all” command to generate a high-quality genomic assembly in a fasta  
132 format of both chromosomes (Supplementary File 1).

133 *V. cholerae* mutants were constructed by natural transformation as described (26).  
134 Mutations in ICP1 were generated using CRISPR-Cas mediated genome engineering with the  
135 *V. cholerae* classical biotype Type I-E system as described (11) (Supplementary Table 3).  
136 Engineered phage +/- Cas1 D244A with a spacer 9 were validated by plaquing on a permissive  
137 PLE 1 host and determining the frequency of phage with a newly acquired spacer by calculating  
138 the efficiency of plaquing on the permissive PLE 1 host to a PLE 1 host with the protospacer  
139 deleted. Examination of PLE replication and transduction during phage infection was described  
140 as reported previously (12).

141

### 142 **High throughput spacer acquisition, data processing and analyses**

143 Three independent experiments were performed as follows: A 50 mL culture of PLE 1 *V.*  
144 *cholerae* was grown to  $OD_{600} = 0.3$  and infected with ICP1\_2011\_A  $\Delta$ S9 (13) at an MOI of 1.  
145 Infected cells were incubated for 90 minutes at 37 °C with aeration, at which point lysis was

146 observed. The lysate was treated with chloroform and centrifuged to remove bacterial debris.  
147 Phage were precipitated with 10% (w/v) polyethylene glycol (PEG) 8000 at 4°C overnight.  
148 Phage pellets were collected by centrifugation at 4°C and the passaging was repeated as  
149 above. After three passages, the resulting pools were plated on the PLE 1<sup>S8</sup> host to select for  
150 phage with expanded arrays that allow plaque formation. Phage DNA libraries were generated  
151 by homopolymer tail-mediated PCR (HTM-PCR) as previously described (27). As ICP1\_2011\_A  
152 possesses only a single functional CRISPR array (Fig. 1b), the expanded phage CRISPR 1  
153 array was amplified from genomic DNA libraries by PCR using custom barcoded primers  
154 (Supplementary Table 4) to sequence the leader proximal spacer. 50bp single-end sequencing  
155 was performed on an Illumina HiSeq 2500 (Tufts University Core Facility) using a custom  
156 sequencing primer. The resulting reads as fastq files (Supplementary File 2) were mapped to  
157 the large and small chromosome of *V. cholerae* strain KDS1 using Bowtie v1.2.2 (28) with a  
158 seed\_length of 31 and allowing for 0 max\_total\_mismatches which ensured that spacer to  
159 protospacer matches were 100% identical. These mappings were performed in two parallel  
160 ways: first, to obtain all possible spacer mapping locations regardless of the number of identical  
161 protospacer targets (i.e. translucent spacers in Fig 3b) and second, restricting max\_alignments  
162 to 1 which only mapped spacers with exactly one unique mapping location across both  
163 chromosomes. With a custom Python script (<https://git.io/fNVqZ>) we extracted the PAM  
164 sequences and GG PAM slippage locations from the restricted unique mappings. We also used  
165 this script to generate spacer mapping location graphs for both set of mappings using  
166 Biopython's GenomeDiagram module (29).

167

## 168 **Results**

### 169 **ICP1-encoded CRISPR-Cas is fixed in the natural phage population**

170 We set out to compare ICP1 and PLE from contemporary cholera patient stool samples  
171 to previously identified isolates from the International Centre for Diarrhoeal Disease Research,

172 Bangladesh (ICDDR,B) in Dhaka, Bangladesh (13,21). We isolated eight new ICP1 isolates  
173 from cholera patient stool samples collected between 2015-2017 and found that all isolates  
174 harbor CRISPR-Cas. Thus it appears that ICP1 isolates lacking CRISPR have not been  
175 identified in Bangladesh since 2006 (23). Analysis of the CRISPR arrays indicates a strong  
176 selection for spacers specifically targeting PLE (Fig. 1b, Supplementary Table 5), supporting the  
177 function of the ICP1-encoded CRISPR-Cas system as a counter-attack against the anti-phage  
178 island PLE (13). To evaluate if the fixation of CRISPR in ICP1 is necessitated by co-circulating  
179 PLE in epidemic *V. cholerae*, we determined the prevalence of PLE over the same near two-  
180 decade long period in Dhaka. Combined with previous analyses (12,21), we observed an  
181 increase in the prevalence of PLE(+) *V. cholerae* in epidemic sampling over time (Fig. 1c). Of  
182 note is the high prevalence of PLE 1 *V. cholerae* over the past 6 years, indicating that this  
183 variant of the anti-phage island is currently dominating the epidemic landscape in Dhaka.  
184 Despite the relatively long period over which PLE 1 has been dominant in Dhaka, and  
185 consistent with previous results (12,21), whole genome sequencing of eight PLE 1 *V. cholerae*  
186 isolates showed that PLE 1 is 100% identical at the nucleotide level in all strains.

187

### 188 **Multiple spacers increase ICP1 CRISPR-Cas mediated PLE interference**

189 All of the natural phage we isolated encode multiple CRISPR spacers against PLE (Fig.  
190 1b); however, previous work revealed that only one functional spacer is required for ICP1 to  
191 overcome PLE-mediated anti-phage activity as evaluated by plaque formation (13). Conversely,  
192 a single spacer against the PLE did not prevent transduction of PLE (12). To investigate the  
193 consequences of varying spacer number and identity on PLE transduction and replication, we  
194 used co-isolated ICP1 and PLE 1 *V. cholerae* obtained from a cholera patient sample in 2011  
195 (13). This ICP1 isolate harbors two spacers (spacers 8 and 9) at the leading edge of the  
196 CRISPR 1 array that target PLE 1. We also used an isogenic phage with a spontaneous loss of  
197 spacer 9 (13), as well as one that acquired an additional 10<sup>th</sup> spacer targeting PLE *in vitro* (Fig.



198 2a). Despite the ability to overcome PLE and form plaques, spacer 8 targeting was not sufficient  
199 to decrease PLE transduction during ICP1 infection relative to an untargeted control (Fig. 2b). In  
200 comparison, two anti-PLE spacers decreased PLE transduction during ICP1 infection and three  
201 spacers completely abolished PLE transduction, showing that increased CRISPR targeting by  
202 ICP1 has a stronger anti-PLE effect. To evaluate potential differences between spacer 8 and  
203 spacer 9 on PLE targeting, we used PLE 1 with a protospacer mutation (PLE 1<sup>PS8\*</sup>) that inhibits  
204 spacer 8-mediated PLE targeting (13). Strikingly, just spacer 9 targeting PLE alone was able to  
205 decrease PLE transduction to the same level as when two spacers were targeting PLE (Fig. 2b).

206 We next analyzed the copy number of PLE during infection with the ICP1 encoding one  
207 or two targeting spacers to identify if the differences in reducing PLE transduction were due to  
208 differences in PLE copy number (Fig 2c). In the absence of ICP1 CRISPR targeting, PLE  
209 replicates to high copy number, which facilitates horizontal transmission. Targeting with only  
210 one spacer was sufficient to significantly decrease PLE replication, and in agreement with the  
211 transduction data, spacer 9 had a stronger inhibitory effect on PLE replication than spacer 8.  
212 Altogether, these results demonstrate that not all spacers selected in nature equally interfere  
213 with PLE mobilization and that increasing the number of spacers provides enhanced capacity of  
214 ICP1 to interfere with PLE.

215

## 216 **Interference-driven spacer acquisition in ICP1 reveals indirect targets and non-canonical** 217 **PAMs**

218 Since spacer composition variability in nature was lower than we expected (Fig 1b), we  
219 next set out to experimentally sample the repertoire of spacers that ICP1 can acquire to  
220 overcome PLE. Low-throughput experiments previously demonstrated that ICP1 can acquire  
221 new spacers targeting the PLE under laboratory conditions without the need to overexpress *cas*  
222 genes (13). To further analyze the natural process of interference-driven spacer acquisition in  
223 this system, we performed high-throughput sequencing of expanded CRISPR arrays of phage

224 selected on PLE 1 *V. cholerae*. We infected PLE 1 *V. cholerae* with ICP1 containing spacer 8  
225 (Fig 2a), and the recovered lysate was probed for ICP1 progeny with newly acquired spacers  
226 that allowed for plaque formation on a PLE 1<sup>PS8\*</sup> host. Illumina sequencing of the leader-  
227 proximal spacer in CRISPR 1 allowed us to sample over 10<sup>6</sup> acquired spacers in each replicate  
228 experiment (Supplementary Table 6). In order to accurately map the spacers to the PLE 1 *V.*  
229 *cholerae* host, we performed complete whole-genome sequencing and assembly of the bacterial  
230 genome (Supplementary File 1). As was previously reported (12), we found that PLE 1 was  
231 integrated in a *V. cholerae* repeat (VCR), of which over 100 repeats intersperse the *V. cholerae*  
232 small chromosome in a gene-capture region, the superintegron (30). In total, 96% of the  
233 acquired spacers mapped to PLE, while, interestingly, the other 4% mapped to *V. cholerae*  
234 chromosomes (Supplementary Table 6).

235 Mapping of the spacers to the small chromosome showed a pattern of strand bias that  
236 reflected previous observations in primed acquisition experiments performed in other Type I-F  
237 systems (31), with a distribution of acquired spacers 5' of the protospacer on the non-targeted  
238 strand and 3' of the protospacer on the targeted strand (Fig. 3a, Supplementary Fig. 2). The  
239 distribution of spacers acquired 5' of the protospacer on the nontargeted were split between the  
240 small chromosomal region proximal to the PLE 1 integration site (Fig. 3b), as well as the 3' end  
241 of PLE. Acquired spacers mapping to the *V. cholerae* chromosome were not evenly distributed  
242 between the large and small chromosome, but instead ~90% of the chromosomal spacers  
243 mapped to the small chromosome (Supplementary Table 6, Fig. 3b). Spacers that mapped to  
244 the large chromosome were restricted to a mu-like region (Fig. 3c), which was duplicated in this  
245 strain and was also in the small chromosome proximal to PLE (Fig. 3b). Acquired spacers  
246 mapped uniformly throughout the superintegron, however, this is likely an artifact as the  
247 superintegron is highly repetitive. When considering spacers that map to a single site in the  
248 small chromosome, we observed an obvious bias for acquired spacers mapping closer to the  
249 PLE integration site (Fig. 3b).

250 Consistent with CRISPR<sup>+</sup> ICP1 isolates from nature (Supplementary Figure 1), the  
251 majority (~70%) of the spacers acquired experimentally targeted protospacers in PLE 1 that  
252 were flanked by a 3' GA PAM (Fig. 3d). However, ~30% of protospacers in PLE had non-  
253 canonical PAMs, and of those, the majority were GG or GT. Previous CRISPR acquisition  
254 studies in Type I-F systems indicate that alternative PAMs can be explained by a “slippage”  
255 event (31,32). To identify putative slippage events, we analyzed the sequences adjacent to GG  
256 PAMs and found that 45% of GG PAMs have a canonical GA within 3 nucleotides of the PAM  
257 position, suggesting that the ICP1 acquisition machinery has a propensity to slip (Fig. 4a).

258 We next wanted to determine if these non-canonical PAMs are functional for PLE  
259 interference. To do so, we engineered ICP1 to encode a single spacer reflective of an  
260 experimentally acquired spacer with the most common non-canonical PAMs: either a GG or GT  
261 (Fig. 3d) and evaluated plaque formation on PLE 1 *V. cholerae*. Despite relying on a non-  
262 canonical PAM, we found that ICP1 is able to target those protospacers and overcome PLE,  
263 albeit at a lower efficiency than when targeting a protospacer with a canonical GA PAM (Fig.  
264 4b). Even when no canonical PAM was within +/- 3 nt, ICP1 was still able to overcome PLE  
265 targeting a protospacer with a GT PAM. As PAM mutations are frequently a source for primed  
266 acquisition (33), we tested if the observed residual CRISPR activity was due to further spacer  
267 acquisition and interference. We constructed a Cas1 D244A mutation, which disrupts a  
268 conserved metal coordinating residue to inhibit spacer acquisition (32) (Supplementary Fig. 3)  
269 and tested if plaque formation was altered (Fig 4b). We observed no difference in the efficiency  
270 of plaque formation between the Cas1 mutants and the parental phage, suggesting that the  
271 ICP1 CRISPR-Cas system is more tolerant of divergent PAMs during infection than previously  
272 characterized (13).

273

274 **Protospacers in the small chromosome facilitate ICP1 CRISPR-Cas-mediated PLE**  
275 **interference**

276 In our spacer acquisition experiment we identified a subset of spacers that target a mu-  
277 like region in the *V. cholerae* large chromosome (Fig. 3c), suggesting that CRISPR targeting of  
278 the mu-like region was advantageous in overcoming PLE. To test the role of the mu-like region  
279 protospacer in PLE interference, we isolated ICP1 that had acquired a spacer that targets the  
280 mu-like region and was able to form plaques on PLE 1<sup>PS8\*</sup> (Fig 5a). Since assembly of the *V.*  
281 *cholerae* genome revealed that the mu-like region was present in each chromosome (Fig 5a) we  
282 wanted to evaluate if targeting the mu-like region *per se* was allowing for plaque formation, or if  
283 the chromosomal context was important in allowing for CRISPR-mediated interference with  
284 PLE. To test this difference, we generated a single knockout of the mu-like region in the large  
285 chromosome and a double knockout in both chromosomes. ICP1 CRISPR-mediated  
286 interference with PLE was abolished in the double knockout, however, knocking out the mu-like  
287 region in the large chromosome had no effect on ICP1 plaque formation (Fig 5b). These results  
288 show that CRISPR targeting of the *V. cholerae* large chromosome is dispensable for phage  
289 overcoming PLE, while targeting the small chromosome is sufficient to overcome PLE activity.

290

### 291 **When CRISPR goes off target: going the distance to maintain interference**

292 As processivity of Cas2-3 has been demonstrated *in vitro* (17), we speculated that ICP1  
293 targeting of the small chromosome proximal to PLE interferes with PLE anti-phage activity by  
294 the processive degradation of PLE along with the chromosome; however, PLE excises from the  
295 chromosome early during ICP1 infection (20). This timing suggests that CRISPR targeting and  
296 Cas2-3 processive degradation of the small chromosome would have to happen prior to PLE  
297 excision and would therefore likely be distance dependent. In support of this hypothesis,  
298 experimentally acquired spacers mapping to the small chromosomal clustered proximal to PLE  
299 (Fig. 3b). To test the impact of targeting at increasing distances from PLE, we engineered ICP1  
300 to possess CRISPR arrays containing only one spacer drawn from the experimental acquisition  
301 pool that targets the small chromosome at varying distances away from PLE. We then assayed

302 the ability of these engineered phage to overcome PLE and form plaques (Fig. 6a). As a  
303 positive control, ICP1 engineered with a spacer that targets internal to PLE formed robust and  
304 equal plaques on PLE(-) and PLE 1 hosts. In comparison, phage with a spacer that targets far  
305 (>400 kb) from PLE were unable to form plaques on PLE 1. Conversely, ICP1 that target a  
306 protospacer only 0.5, 1.5 or 2.5 kb from PLE were able to efficiently overcome PLE and form  
307 plaques. Phage targeting protospacers at intermediate distances away from PLE (>20 kb)  
308 demonstrated weak plaque formation on PLE 1. Surprisingly, we observed that ICP1 with some  
309 spacers targeting relatively far from PLE (53 and 46kb away) were still able to form robust  
310 plaques on PLE 1 (Fig 6a). While all of the spacers selected for this assay had one perfect  
311 protospacer match in the chromosome (and have a GA PAM), we identified >100 putative  
312 promiscuous target sites for these spacers which would bring the chromosomal target much  
313 closer to PLE 1, which may explain these phage's ability to overcome PLE. To test if spacer  
314 acquisition had a role in plaque formation, we engineered Cas1 deficient ICP1 in each CRISPR  
315 proficient chromosomal targeting phage and assayed for plaque formation on the PLE 1 host.  
316 Despite being unable to acquire spacers (Supplementary Fig. 3), the phage retained the same  
317 plaquing phenotype. We quantified the weaker plaque formation observed when ICP1 targets  
318 >20 kb away from PLE 1 by measuring plaque size compared to PLE (-) *V. cholerae* (Fig 6b).  
319 As compared to phage with PLE internal and PLE proximal spacers, phage with chromosomal  
320 spacers targeting >20 kb away from PLE had significantly limited plaque size. These results  
321 indicate that some PLE-mediated anti-phage activity is retained when CRISPR-Cas is directed  
322 at increasing distances from PLE in the small chromosome.

323 To control for differences in spacer sequences, we also varied the location of the PLE  
324 and tested the ability of ICP1 with a single chromosomal spacer targeting the small  
325 chromosome to interfere with PLE 1. Following ICP1-mediated transduction, PLE 1 integrates  
326 into the *V. cholerae* repeat (VCR) of the new host (12). We collected a pool of PLE 1  
327 transductants where PLE was integrated at varying distances from the chromosomal

328 protospacer and challenged these strains with ICP1. As a control, we determined that all of the  
329 tested PLE 1 *V. cholerae* hosts were susceptible to ICP1 CRISPR-Cas interference when ICP1  
330 possessed a PLE internal spacer (Supplementary Fig. 4); consistent with our earlier finding,  
331 PLE integrated at an increasing distance away from the protospacer was less susceptible to  
332 ICP1-encoded CRISPR interference (Fig. 6c).

333

## 334 **Discussion**

335 Our results reveal that the latest front in the ongoing arms race between contemporary  
336 isolates of epidemic *V. cholerae* and its predator ICP1 necessitate the persistence of the ICP1-  
337 encoded Type I-F CRISPR-Cas system to counter PLE-mediated anti-phage activity (Fig 1). By  
338 using a high-throughput spacer acquisition assay, we gained insight into the full range of  
339 spacers that can combat PLE. Interestingly, our experimental findings on acquisition and  
340 interference do not reflect the rather limited diversity of spacers that ICP1 maintains against  
341 PLE in nature. These results highlight that not all spacers are equally proficient for interference,  
342 and that coupled analysis of these competing mobile genetic elements from nature reveals the  
343 evolutionary benefits of a particular complement of spacers more so than laboratory-based  
344 studies. Despite a lack of clear evidence indicating where the ICP1-encoded CRISPR-Cas  
345 system originated, it serves as a tractable model through which we can examine the biology of  
346 an endogenous Type I-F CRISPR-Cas system against its cognate foe.

347 Co-culture studies competing phage against CRISPR-Cas proficient bacterial hosts  
348 demonstrated that mutational escape by phage is limited by bacterial populations that have  
349 heterogenous CRISPR arrays (34). Here, we see that PLE 1 is highly conserved over time,  
350 even when co-circulating with CRISPR proficient ICP1. In light of previous suggestions, the  
351 diversity of CRISPR arrays in ICP1 populations may limit the success of PLE escape mutants.  
352 Surprisingly, however, we see very little diversity in the spacer composition of ICP1 CRISPR  
353 arrays with the same minimal spacers being conserved in phage circulating for over eight years

354 (Fig. 1b). Likewise, CRISPR-proficient ICP1 isolated from nature always encoded more than  
355 one spacer against PLE, which would be expected to limit CRISPR escape mutations. It may be  
356 that there is limited room for genetic drift in the PLE genome, permitting ICP1 to streamline its  
357 CRISPR array, keeping only the most efficient spacers while also maintaining an advantageous  
358 genome size.

359 Akin to studies of bacterial Type I-F CRISPR-Cas mediated interference with plasmid  
360 transformation and conjugation (35), we similarly see that the spacer sequence and quantity of  
361 spacers in the array have a role in ICP1's ability to abolish PLE spread (Fig. 2). This may be  
362 due to differences in crRNA abundance or stability, or sequence dependent subtleties that  
363 dictate interference potential, as has been proposed previously (36). Despite spacer 9's  
364 improved interference with PLE mobilization compared to spacer 8, we still observed a slight  
365 defect in plaque size when comparing engineered phage with only spacer 9 relative to a PLE(-)  
366 host (Fig. 6b), suggesting that even this improved spacer alone is not sufficient to fully  
367 overcome PLE-mediated anti-phage activity. By encoding a seemingly redundant set of spacers  
368 targeting PLE, ICP1 increases its ability to overcome PLE and limit PLE spread in the  
369 environment.

370 As expected, the majority of spacers acquired in our high-throughput acquisition assay  
371 directly target PLE (Fig. 3a). Analysis of natural ICP1 isolates recovered from cholera patient  
372 stool samples shows that the phage-encoded CRISPR-Cas system recognizes a GA PAM,  
373 (Supplementary Fig. 1) which, although atypical for Type I-F systems (37), has been confirmed  
374 through single mutations to a C in both positions (13). Notably, we found that ICP1 was able to  
375 incorporate spacers that targeted non-canonical PAMs (Fig. 3d) and that these spacers can  
376 suffice for PLE interference (Fig. 4b). In comparison to another high throughput spacer  
377 acquisition assay in a Type I-F system, which found >90% of all protospacers flanked by the  
378 canonical PAM (31), it appears that the phage-encoded system is less discriminating with only  
379 70% of protospacers flanked by the expected PAM. However, targeting a protospacer with a

380 non-canonical PAM reduced the efficiency of plaquing compared to the canonical PAM (Fig 4b).  
381 As such, in nature ICP1 targeting a protospacer with a non-canonical PAM would not be able to  
382 completely interfere with PLE and thus would be selected against. This hypothesis is  
383 additionally supported by the observation that very few non-canonical PAM protospacers were  
384 associated with indirect targets in the small chromosome. As these chromosomal spacers are  
385 themselves less proficient for interference (Fig. 6a and 6b), the added disadvantage of targeting  
386 a protospacer with a non-canonical PAM likely tips the balance in favor of PLE, likely explaining  
387 the lower abundance of these spacers in our selection experiments.

388         Despite the presence of spacers that target the *V. cholerae* large chromosome in the  
389 high-throughput spacer acquisition assay (Fig. 3c), we show that targeting this chromosome is  
390 dispensable for CRISPR interference of PLE (Fig. 5b). Interestingly, two of the natural ICP1  
391 isolates contain a spacer that targets a gene on the *V. cholerae* large chromosome (Fig. 1b).  
392 We speculate that this spacer was acquired from a *V. cholerae* strain possessing a duplication  
393 or rearrangement that is not represented in currently sequenced isolates, in which the  
394 protospacer was in the small chromosome proximal to PLE, allowing the phage to overcome  
395 PLE activity. However, this spacer does not seem to be maintained in the phage population,  
396 likely due to diminished PLE interference relative to PLE-direct spacers as we experimentally  
397 observed.

398         CRISPR targeting of the *V. cholerae* small chromosome can overcome PLE, but our  
399 results suggest a model in which there is a limit to the distance over which processive Cas2-3  
400 degradation can occur to reach the PLE prior to excision (Fig. 6d), an action which occurs within  
401 five minutes of ICP1 infection that is directed by an early-expressed ICP1 protein (20). The limit  
402 of processivity appears to be around a distance of 23 kb (Fig. 6a and 6c), at which point either  
403 Cas2-3 is unable to continue to process along the *V. cholerae* chromosome or PLE excises  
404 before interference occurs. *In vitro* studies of Cas3 from Type I-E systems have demonstrated  
405 Cas3 translocation velocities of 89 to 300 bases per second and average processivities



406 between 12 to 19 kb (38,39), however, the functional role and limitations of processivity *in vivo*  
407 are not known. Our results are the first indications of Cas2-3 processivity *in vivo*, with over 22 kb  
408 from a distal chromosomal protospacer over which CRISPR-Cas can maintain activity to  
409 overcome PLE. As this event must occur within five minutes of ICP1 initiating infection, the  
410 estimated processivity of ICP1 Cas2-3 is within the range of what has been reported for Type I-  
411 E Cas3, which is especially remarkable given the complexity of the crowded intracellular  
412 environment compared to simplified *in vitro* systems.

413 In comparison to other Cas nucleases like Cas9, which introduces a single double-  
414 stranded break (40,41), Cas2-3 degrades DNA as it translocates away from the protospacer  
415 (17), making it more likely to destroy and thus interfere with its target. This predicted advantage  
416 may account for the increased prevalence of Type I systems for phage defense (42). In the  
417 context of the battle between ICP1 and PLE, this processivity permits interference even with an  
418 indirect CRISPR target and has important implications for harnessing CRISPR-Cas in  
419 biotechnology and medicine. Since the characterization of the ICP1-encoded CRISPR-Cas  
420 system, phage engineered with CRISPR-Cas systems to target virulent, antibiotic resistant  
421 bacteria have been assayed for therapeutic applications (43,44), showing the value of  
422 innovating from natural systems to overcome disparate biological problems.

423

#### 424 **Additional Information**

#### 425 **Acknowledgments**

426 The authors are especially thankful to ICDDR,B hospital and laboratory staff for their support  
427 and would like to thank Shirajum Monira, Kazi Zillur Rahman, Fatema-tuz Johura, Marzia  
428 Sultana, and Monika Sultana in particular. The authors would also like to thank members of the  
429 Seed lab for critical feedback and thoughtful discussion regarding this manuscript.

#### 430 **Ethics**

431 The collection of cholera patient stools were approved by the ICDDR,B institutional review  
432 board. All samples were deidentified and written informed consent was obtained from adult  
433 participants and from the guardians of children.

#### 434 **Data Accessibility**

435 The datasets supporting this article have been uploaded as part of the Supplementary Material.

#### 436 **Authors' Contributions**

437 ACM, KNL and KDS carried out the molecular lab work. AA developed and implemented tools  
438 for sequence data analysis. MA coordinated the collection of clinical specimens. ACM, MA and  
439 KDS conceived of the study. All authors participated in data analysis. ACM and KDS wrote the  
440 manuscript with input from all authors and all authors gave final approval for publication.

#### 441 **Competing Interests**

442 We declare we have no competing interests.

#### 443 **Funding**

444 This research was funded by the National Institute of Allergy and Infectious Diseases grant  
445 number R01AI127652 (K.D.S.). A.C.M. received support from the Kathleen L. Miller Fellowship  
446 from the Henry Wheeler Center for Emerging and Neglected Diseases. K.N.L. received support  
447 from the National Science Foundation Graduate Research Fellowship Program. K.D.S. is a  
448 Chan Zuckerberg Biohub Investigator. M.A. of ICDDR,B gratefully acknowledges the following  
449 donors which provide unrestricted support: Government of the People's Republic of  
450 Bangladesh, Global Affairs Canada (GAC), Swedish International Development Cooperation  
451 Agency (SIDA), and the Department for International Development, UK Aid.

452

#### 453 **References.**

454 1. Parikka KJ, Le Romancer M, Wauters N, Jacquet S. Deciphering the virus-to-prokaryote  
455 ratio (VPR): Insights into virus-host relationships in a variety of ecosystems. *Biol Rev.*  
456 2017;92:1081–100.

- 457 2. Dy RL, Richter C, Salmond GPC, Fineran PC. Remarkable Mechanisms in Microbes to  
458 Resist Phage Infections. *Annu Rev Virol.* 2014;1(1):307–31.
- 459 3. Hille F, Richter H, Wong SP, Bratovič M, Ressel S, Charpentier E. The Biology of  
460 CRISPR-Cas: Backward and Forward. *Cell.* 2018;172(6):1239–59.
- 461 4. Barrangou R, Fremaux C, Deveau H, Richards M, Boyaval P, Moineau S, et al. CRISPR  
462 Provides Acquired Resistance Against Viruses in Prokaryotes. *Science.*  
463 2007;315(5819):1709–12.
- 464 5. Sinkunas T, Gasiunas G, Fremaux C, Barrangou R, Horvath P, Siksnys V. Cas3 is a  
465 single-stranded DNA nuclease and ATP-dependent helicase in the CRISPR/Cas immune  
466 system. *EMBO J.* 2011;30(7):1335–42.
- 467 6. Koonin E V., Makarova KS. Mobile genetic elements and evolution of CRISPR-Cas  
468 systems: all the way there and back. *Genome Biol Evol.* 2017;9(10):2812–25.
- 469 7. Shmakov, Sergey; Sitnik, Vassilii; Makarova, Kira; Wolf, Yuri; Severinov, Konstantin;  
470 Koonin E. The CRISPR Spacer Space Is Dominated by Sequences from Species-  
471 Specific Mobilomes. *MBio.* 2017;8(5):e01397-17.
- 472 8. Palmer KL, Gilmore MS. Multidrug-Resistant Enterococci Lack CRISPR-Cas. *MBio.*  
473 2010;1(4):e00227-10.
- 474 9. Bikard D, Hatoum-Aslan A, Mucida D, Marraffini LA. CRISPR interference can prevent  
475 natural transformation and virulence acquisition during in vivo bacterial infection. *Cell*  
476 *Host Microbe.* 2012;12(2):177–86.
- 477 10. Novick RP, Ram G. The Floating (Pathogenicity) Island: A Genomic Dessert. *Trends*  
478 *Genet.* 2016;32(2):114–26.
- 479 11. Box AM, McGuffie MJ, O'Hara BJ, Seed KD. Functional analysis of bacteriophage  
480 immunity through a Type I-E CRISPR-Cas system in *Vibrio cholerae* and its application in  
481 bacteriophage genome engineering. *J Bacteriol.* 2015;198(3):578–90.
- 482 12. O'Hara BJ, Barth ZK, McKitterick AC, Seed KD. A highly specific phage defense system

- 483 is a conserved feature of the *Vibrio cholerae* mobilome. PLoS Genet.  
484 2017;13(6):e1006838.
- 485 13. Seed KD, Lazinski DW, Calderwood SB, Camilli A. A bacteriophage encodes its own  
486 CRISPR/Cas adaptive response to evade host innate immunity. Nature.  
487 2013;494(7438):489–91.
- 488 14. Wilkinson ME, Nakatani Y, Staals RHJ, Kieper SN, Opel-Reading HK, McKenzie RE, et  
489 al. Structural plasticity and *in vivo* activity of Cas1 from the type I-F CRISPR-Cas system.  
490 Biochem J. 2016;473(8):1063–72.
- 491 15. Richter C, Fineran PC. The subtype I-F CRISPR–Cas system influences pathogenicity  
492 island retention in *Pectobacterium atrosepticum* via crRNA generation and Csy complex  
493 formation. Biochem Soc Trans. 2013;41(6):1468–74.
- 494 16. Fagerlund RD, Wilkinson ME, Klykov O, Barendregt A, Pearce FG, Kieper SN, et al.  
495 Spacer capture and integration by a type I-F Cas1–Cas2-3 CRISPR adaptation complex.  
496 Proc Natl Acad Sci. 2017;114(26):E5122–8.
- 497 17. Rollins MF, Chowdhury S, Carter J, Golden SM, Wilkinson RA, Bondy-Denomy J, et al.  
498 Cas1 and the Csy complex are opposing regulators of Cas2/3 nuclease activity. Proc Natl  
499 Acad Sci. 2017;114(26):E5113–21.
- 500 18. Bellas CM, Anesio AM, Barker G. Analysis of virus genomes from glacial environments  
501 reveals novel virus groups with unusual host interactions. Front Microbiol. 2015;6(656).
- 502 19. Chénard C, Wirth JF, Suttle CA. Viruses Infecting a Freshwater Filamentous  
503 Cyanobacterium (*Nostoc* sp.) Encode a Functional CRISPR Array and a Proteobacterial  
504 DNA Polymerase B. MBio. 2016;7(3):e00667-16.
- 505 20. McKitterick AC, Seed KD. Anti-phage islands force their target phage to directly mediate  
506 island excision and spread. Nat Commun. 2018;9(2348).
- 507 21. Naser I Bin, Hoque MM, Nahid MA, Rocky MK, Faruque SM. Analysis of the CRISPR-  
508 Cas system in bacteriophages active on epidemic strains of *Vibrio cholerae* in

- 509 Bangladesh. Sci Rep. 2017;7(1):14880.
- 510 22. Seed KD, Bodi KL, Kropinski AM, Ackermann H-W, Calderwood SB, Qadri F, et al.  
511 Evidence of a Dominant Lineage of *Vibrio cholerae*-Specific Lytic Bacteriophages Shed  
512 by Cholera Patients over a 10-Year Period in Dhaka, Bangladesh. MBio.  
513 2011;2(1):e00334-10.
- 514 23. Angermeyer A, Das MM, Singh DV, Seed KD. Analysis of 19 Highly Conserved *Vibrio*  
515 *cholerae* Bacteriophages Isolated from Environmental and Patient Sources Over a  
516 Twelve-Year Period. Viruses. 2018;10(6):299.
- 517 24. Koren S, Walenz BP, Berlin K, Miller JR, Bergman NH, Phillippy AM. Canu: scalable and  
518 accurate long-read assembly via adaptive *k*-mer weighting and repeat separation.  
519 Genome Res. 2017;27(5):722–36.
- 520 25. Walker BJ, Abeel T, Shea T, Priest M, Abouelliel A, Sakthikumar S, et al. Pilon: An  
521 Integrated Tool for Comprehensive Microbial Variant Detection and Genome Assembly  
522 Improvement. PLoS One. 2014;9(11):e112963.
- 523 26. Dalia AB, Lazinski DW, Camilli A. Identification of a Membrane-Bound Transcriptional  
524 Regulator That Links Chitin and Natural Competence in *Vibrio cholerae*. MBio.  
525 2014;5(1):e01028-13.
- 526 27. Lazinski DW, Camilli A. Homopolymer tail-mediated ligation PCR: A streamlined and  
527 highly efficient method for DNA cloning and library construction. Biotechniques.  
528 2013;54(1):25–34.
- 529 28. Langmead B, Trapnell C, Pop M, Salzberg SL. Ultrafast and memory-efficient alignment  
530 of short DNA sequences to the human genome. Genome Biol. 2009;10(3):R25.
- 531 29. Cock PJA, Antao T, Chang JT, Chapman BA, Cox CJ, Dalke A, et al. Biopython : freely  
532 available Python tools for computational molecular biology and bioinformatics.  
533 Bioinformatics. 2009;25(11):1422–3.
- 534 30. Barker A, Clark CA, Manning PA. Identification of VCR, a repeated sequence associated

- 535 with a locus encoding a hemagglutinin in *Vibrio cholerae* O1. J Bacteriol.  
536 1994;176(17):5450–8.
- 537 31. Staals RHJ, Jackson SA, Biswas A, Brouns SJJ, Brown CM, Fineran PC. Interference-  
538 driven spacer acquisition is dominant over naive and primed adaptation in a native  
539 CRISPR-Cas system. Nat Commun. 2016;7:12853.
- 540 32. Vorontsova D, Datsenko KA, Medvedeva S, Bondy-Denomy J, Savitskaya EE, Pougach  
541 K, et al. Foreign DNA acquisition by the I-F CRISPR-Cas system requires all components  
542 of the interference machinery. Nucleic Acids Res. 2015;43(22):10848–60.
- 543 33. Van Erp PBG, Jackson RN, Carter J, Golden SM, Bailey S, Wiedenheft B. Mechanism of  
544 CRISPR-RNA guided recognition of DNA targets in *Escherichia coli*. Nucleic Acids Res.  
545 2015;43(17):8381–91.
- 546 34. Van Houte S, Ekroth AKE, Broniewski JM, Chabas H, Ashby B, Bondy-Denomy J, et al.  
547 The diversity-generating benefits of a prokaryotic adaptive immune system. Nature.  
548 2016;532(7599):385–8.
- 549 35. Richter C, Dy RL, McKenzie RE, Watson BNJ, Taylor C, Chang JT, et al. Priming in the  
550 Type I-F CRISPR-Cas system triggers strand-independent spacer acquisition, bi-  
551 directionally from the primed protospacer. Nucleic Acids Res. 2014;42(13):8516–26.
- 552 36. Xue C, Seetharam AS, Musharova O, Severinov K, Brouns SJJ, Severin AJ, et al.  
553 CRISPR interference and priming varies with individual spacer sequences. Nucleic Acids  
554 Res. 2015;43(22):10831–47.
- 555 37. Mojica FJM, Díez-Villaseñor C, García-Martínez J, Almendros C. Short motif sequences  
556 determine the targets of the prokaryotic CRISPR defence system. Microbiology.  
557 2009;155(3):733–40.
- 558 38. Redding S, Sternberg SH, Marshall M, Gibb B, Bhat P, Guegler CK, et al. Surveillance  
559 and Processing of Foreign DNA by the *Escherichia coli* CRISPR-Cas System. Cell.  
560 2015;163(4):854–65.

- 561 39. Brown MW, Dillard KE, Xiao Y, Dolan AE, Hernandez ET, Dahlhauser S, et al. Assembly  
562 and translocation of a CRISPR-Cas primed acquisition complex. *bioRxiv* [Internet]. 2017;  
563 Available from: <https://doi.org/10.1101/208058>
- 564 40. Garneau JE, Dupuis M-E, Villion M, Romero DA, Barrangou R, Boyaval P, et al. The  
565 CRISPR/Cas bacterial immune system cleaves bacteriophage and plasmid DNA. *Nature*.  
566 2010;468(7320):67–71.
- 567 41. Jinek M, Chylinski K, Fonfara I, Hauer M, Doudna JA, Charpentier E. A Programmable  
568 Dual-RNA-guided DNA endonuclease in adaptive bacterial immunity. *Science*.  
569 2012;337(6096):816–21.
- 570 42. Makarova KS, Wolf YI, Alkhnbashi OS, Costa F, Shah SA, Saunders SJ, et al. An  
571 updated evolutionary classification of CRISPR-Cas systems. *Nat Rev Microbiol*.  
572 2015;13(11):722–36.
- 573 43. Yosef I, Manor M, Kiro R, Qimron U. Temperate and lytic bacteriophages programmed to  
574 sensitize and kill antibiotic-resistant bacteria. *Proc Natl Acad Sci*. 2015;112(23):7267–72.
- 575 44. Bikard D, Euler CW, Jiang W, Nussenzweig PM, Goldberg GW, Duportet X, et al.  
576 Exploiting CRISPR-cas nucleases to produce sequence-specific antimicrobials. *Nat*  
577 *Biotechnol*. 2014;32(11):1146–50.
- 578 45. Crooks G, Hon G, Chandonia J, Brenner S. WebLogo: a sequence logo generator.  
579 *Genome Res*. 2004;14(6):1188–90.
- 580 46. Bawono P, Heringa J. PRALINE: A Versatile Multiple Sequence Alignment Toolkit.  
581 *Methods Mol Bio*. 2014;1079:245–62.

582

583

584

585 **Figures**

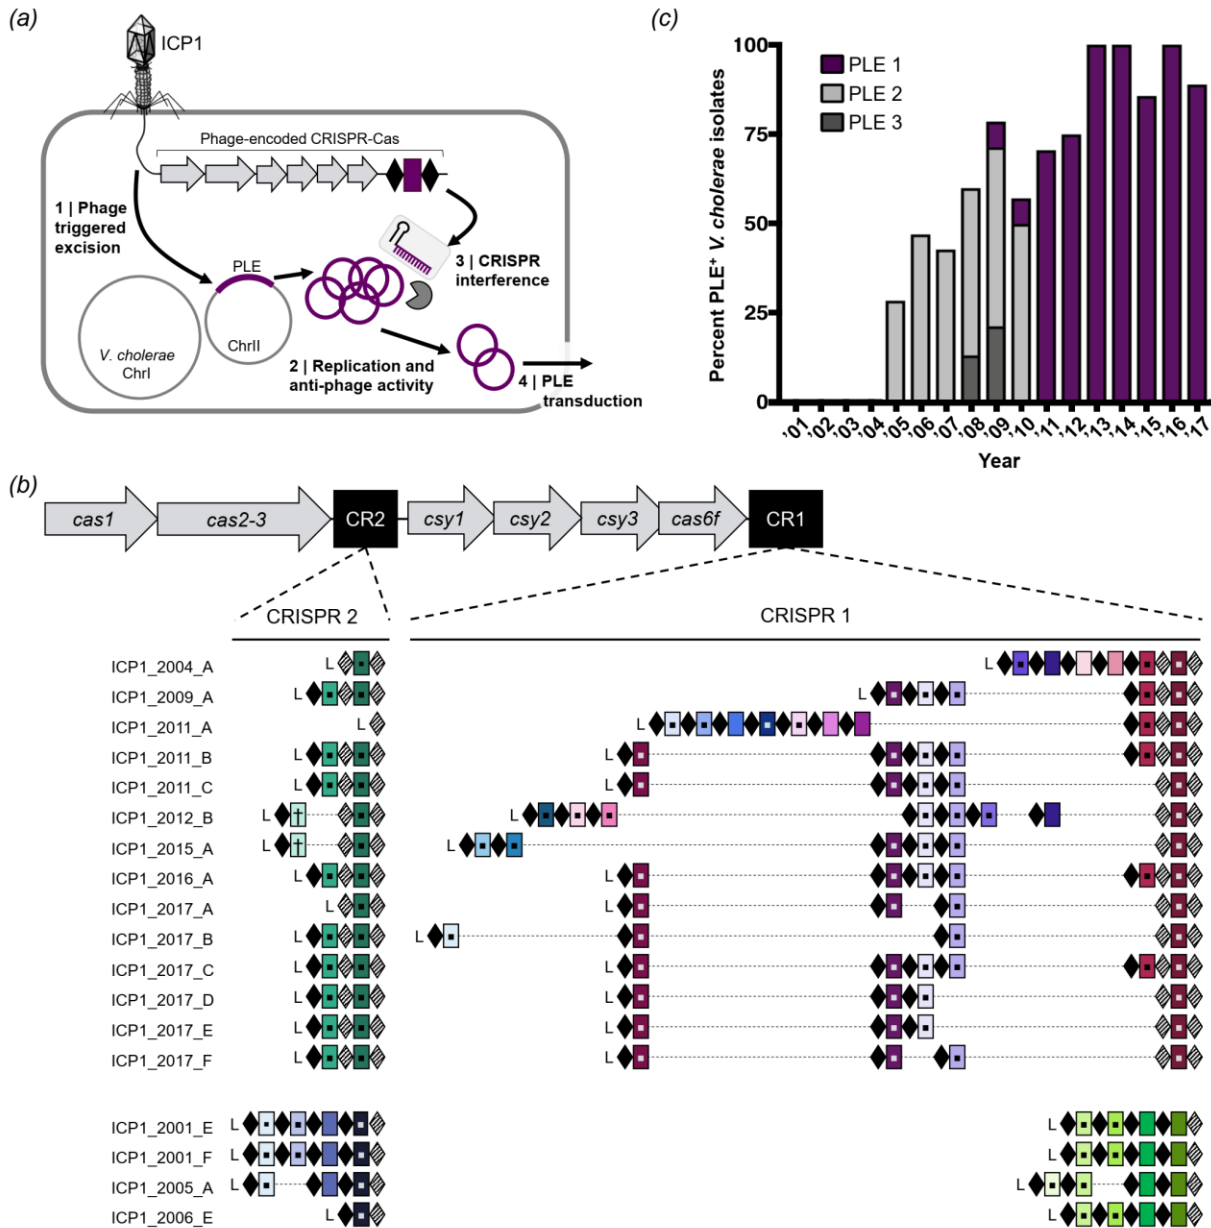

586

587 **Figure 1. ICP1 uses CRISPR-Cas to overcome epidemic *V. cholerae* PLE.** (a) Lytic phage

588 ICP1 infects *V. cholerae* triggering PLE excision (20). PLE replicates and exerts anti-phage

589 activity, ultimately leading to PLE transduction. Concurrently, ICP1-encoded CRISPR-Cas is

590 expressed to interfere with PLE activity. (b) The architecture of the ICP1 CRISPR-Cas system

591 and comparison of spacer composition between phage isolates. For each CRISPR locus, the



592 repeat (28 bp) and spacer (32 bp) content is detailed as black diamonds and colored rectangles,  
593 respectively. Repeats that match the repeat consensus (13) are shown in solid diamonds, and  
594 degenerate repeats are indicated in hatched black diamonds. An AT-rich leader sequence (L)  
595 precedes each CRISPR locus. Identical spacers shared between isolates are shown as  
596 rectangles with identical colors. Spacers containing a square target PLE, and spacers  
597 containing a cross target the *V. cholerae* large chromosome. (c) Percentage of *V. cholerae*  
598 isolates harboring PLE recovered from epidemic sampling at the ICDDR,B over time (n=230  
599 strains analyzed).  
600

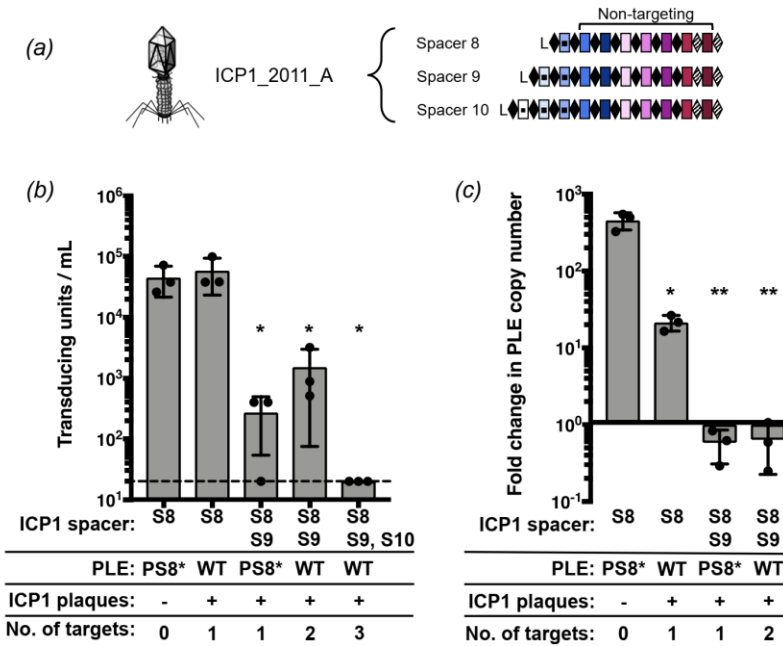

601

602 **Figure 2. CRISPR can limit horizontal transmission of PLE.** (a) ICP1\_2011\_A with anti-PLE

603 spacers S8, S9 and S10 tested in panels b and c. (b) PLE transduction after infection with ICP1

604 with 0,1,2 or 3 spacers. The dashed line indicates the limit of detection for this assay. A single

605 spacer is necessary and sufficient to permit lytic growth of ICP1 on PLE 1 *V. cholerae* as seen

606 by equal plaque formation. (c) PLE replication 20 minutes after infection with ICP1 with 0,1 or 2

607 spacers as determined by qPCR. For panels b and c, error bars indicate standard deviations of

608 biological triplicates. Significance was determined by T Test, \*  $p < 0.05$ , \*\*  $p < 0.005$ .

609

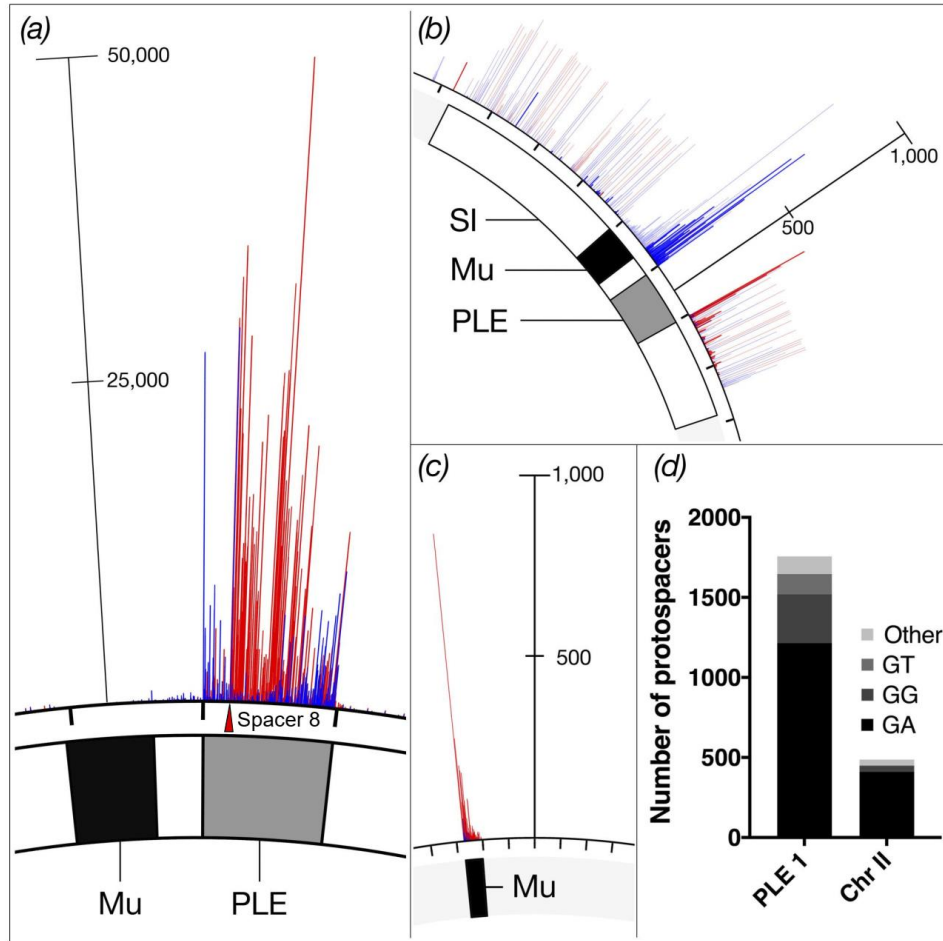

610

611 **Figure 3. High-throughput interference driven spacer acquisition mapping.** (a) The  
612 locations of the ICP1 CRISPR leader-proximal spacer on *V. cholerae* small chromosome. The  
613 location of the interference-efficient spacer (S8) is indicated with the red triangle. (b) Spacer  
614 locations on the *V. cholerae* small chromosome (PLE mappings not shown for clarity). Uniquely  
615 mapped spacers are shown in solid blue or red, while translucent bars show mapping of  
616 spacers to all possible locations. (c) Spacer locations on the large chromosome. For panels a, b  
617 and c, spacers on the plus and minus strand are indicated in red and blue, respectively. The  
618 scale bar measures the number of mapped spacers, and the tick marks around the  
619 chromosome are in 18kb intervals. The white box represents the superintegron (SI), the black  
620 box is the mu-like region and the grey box is PLE 1. (d) Proportion of unique protospacers with  
621 a GA or other dinucleotide PAM sequence in PLE or in the small chromosome.

622

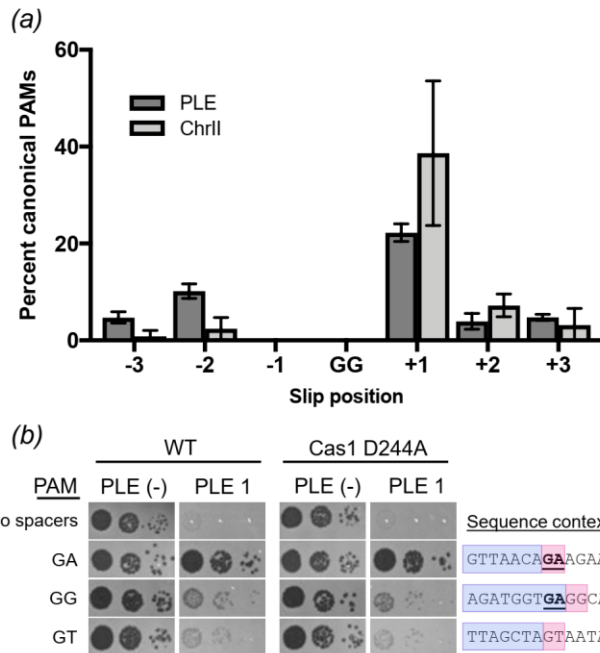

623

624 **Figure 4. Characterizing non-canonical PAMs.** (a) Frequency of canonical GA PAM +/- 3nt  
 625 from non-canonical GG PAM across all data sets. (b) Tenfold dilutions of ICP1 engineered to  
 626 contain a spacer that targets PLE 1 with a non-canonical PAM spotted on *V. cholerae* PLE(-) or  
 627 PLE 1 lawns showing the ability of different phage strains to form plaques (dark spots, zones of  
 628 killing) (left). Sequence context (right) of the region adjacent to the PAM. The protospacer is  
 629 boxed in purple and PAM is boxed in pink. The consensus canonical PAM GA is bolded and  
 630 underlined.

631

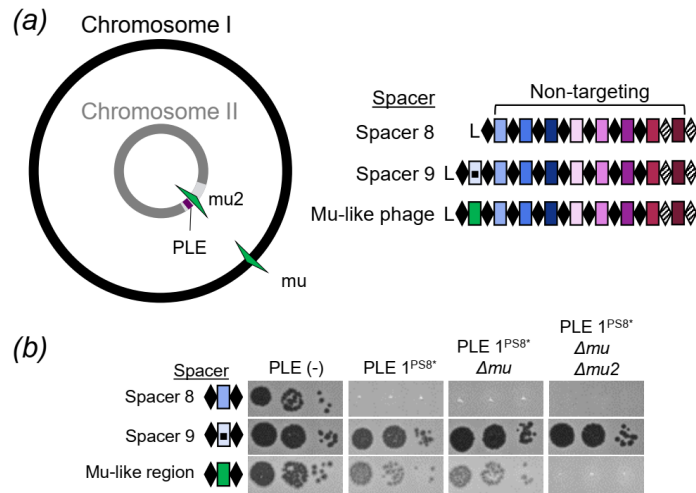

632

633 **Figure 5. ICP1 CRISPR-targeting of the small chromosome facilitates PLE interference.**

634 (a) Cartoon (left) of the *V. cholerae* large and small chromosomes. The superintegron is shown

635 in light grey, the PLE is shown in purple. The two mu-like regions in the large and small

636 chromosome are shown in green arrows. ICP1\_2011\_A CRISPR variants (right) used to test the

637 role of targeting sites. (b) Tenfold dilutions of ICP1 with the spacers indicated spotted on *V.*

638 *cholerae* lawns showing the ability of different phage strains to form plaques.

639

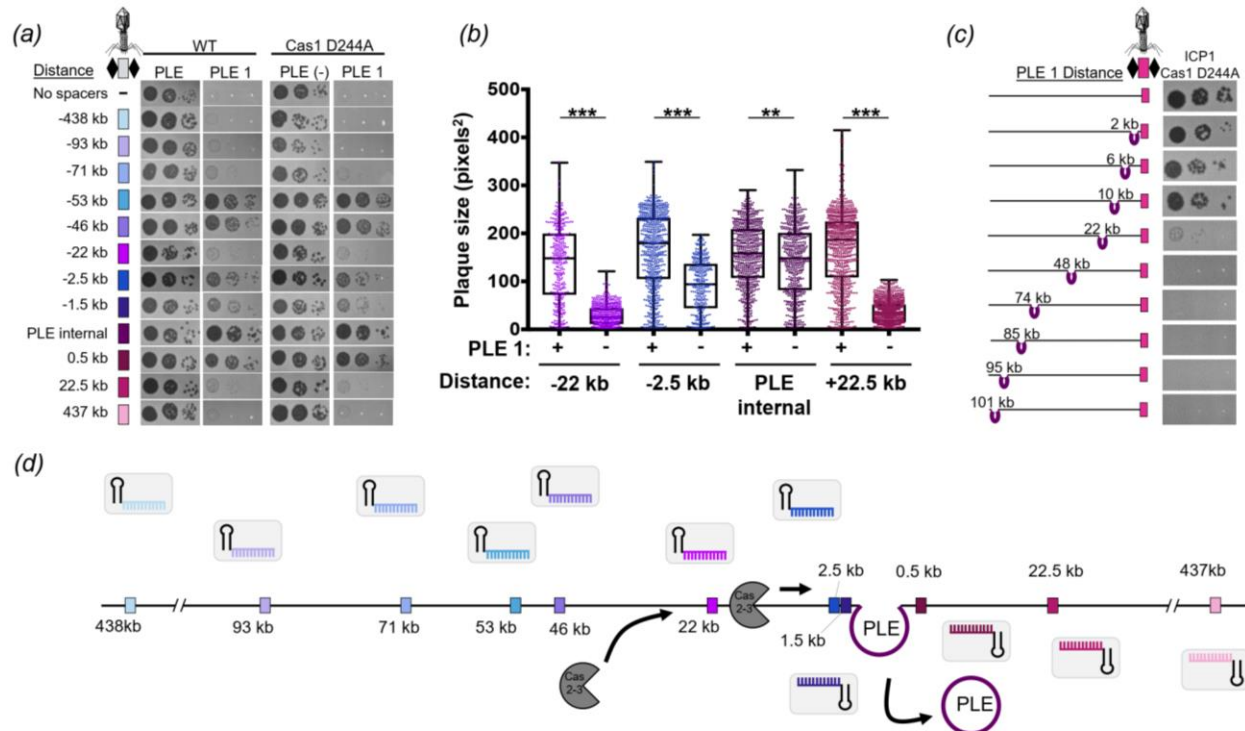

640

641 **Figure 6. Interference potential of spacers directed to the small chromosome is**

642 **dependent on proximity to PLE.** (a) Tenfold dilutions ICP1 engineered with a chromosomal

643 protospacer +/- Cas1 spotted on lawns of *V. cholerae*. (b) Plaque size of ICP1 variants plated

644 with *V. cholerae*. The distance of the chromosomal protospacer from PLE 1 integration site is

645 indicated. Significance was determined by Mann-Whitney U Test, \*\*p < 0.005, \*\*\*p < 0.0001. (c)

646 Tenfold dilutions of ICP1 engineered with a chromosomal protospacer spotted on lawns of *V.*

647 *cholerae* harboring PLE in different locations in the chromosome. (d) Model of race between

648 ICP1 Cas2-3 processive degradation of the *V. cholerae* chromosome and ICP1-mediated PLE

649 excision. Csy complexes (grey boxes) with crRNAs (colored) search for a complementary

650 protospacer (colored rectangles, experimentally assessed in panel a). Cas2-3 (dark grey) is

651 recruited to the protospacer and processively degrades the DNA towards PLE (purple). ICP1 is

652 able to form plaques when Cas2-3 degrades PLE before PLE excises from the chromosome,

653 which occurs within 5 minutes of ICP1 infection.

654

655

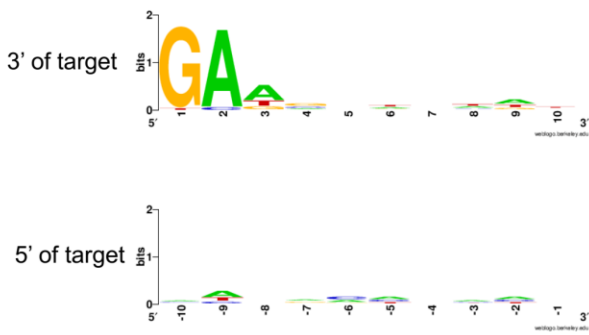

656

657 **Supplementary Figure 1. Sequence logo of PAMs of natural ICP1 isolates.** The PAM  
658 sequence of the ICP1-encoded CRISPR-Cas system. Alignment of flanking sequence of all  
659 known targets of spacers found in natural ICP1 isolates. Sequence logos were generated using  
660 WebLogo (45).

661

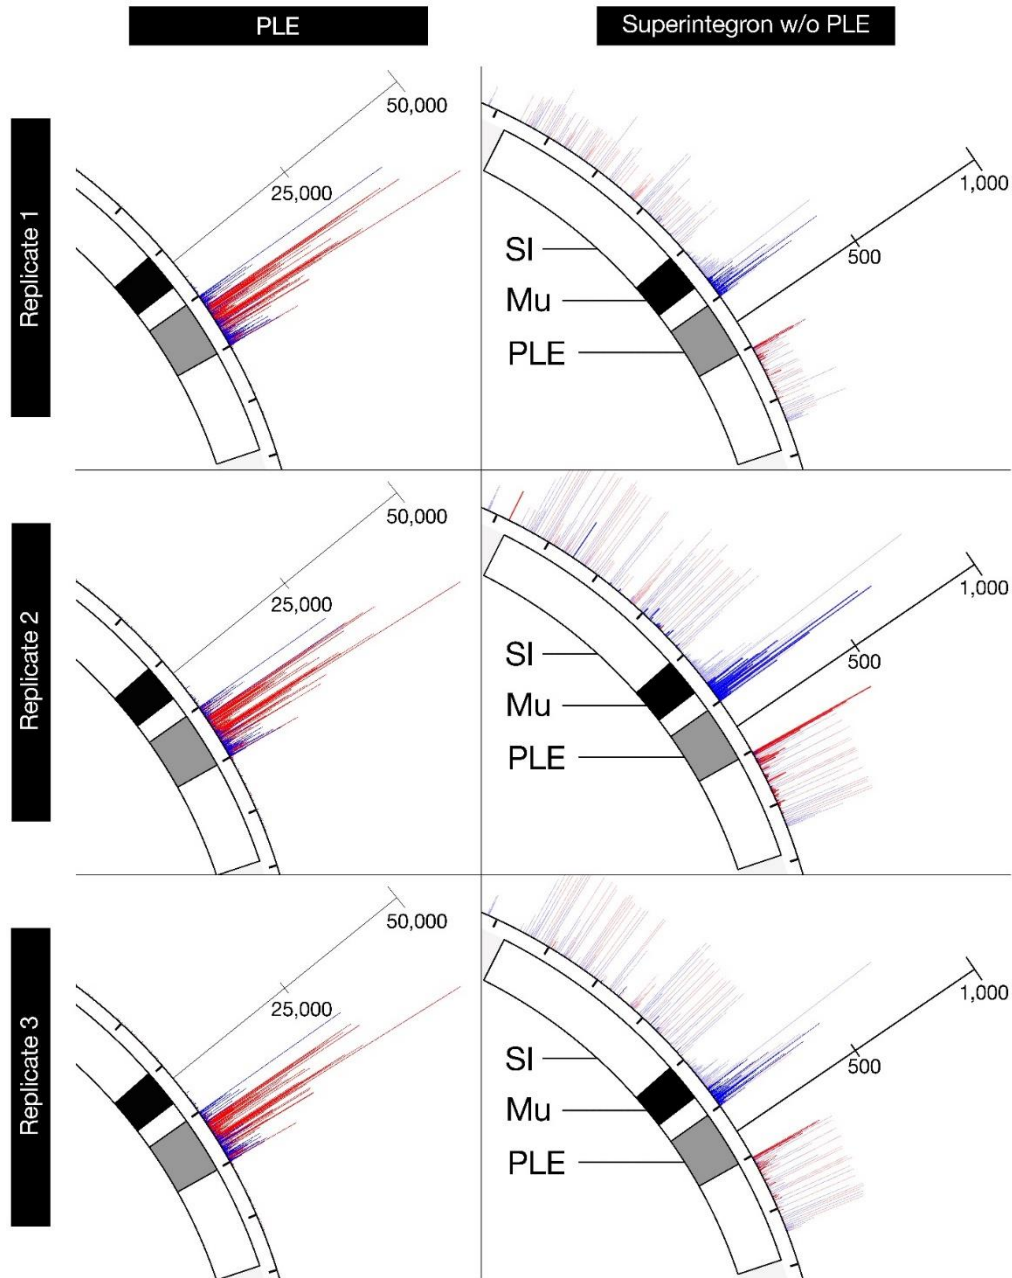

662

663 **Supplementary Figure 2. Replicates of high-throughput ICP1 spacer acquisition mapping.**

664 Spacer locations of the most leader-proximal spacers on the plus and minus strand are  
665 indicated in red and blue, respectively. Uniquely mapped spacers are shown in solid blue or red,  
666 while translucent bars show mapping of spacers to all possible locations. The scale bars  
667 measure the number of mapped spacers, and the tick marks around the chromosome are in  
668 18kb intervals. Replicate 2 is the same data as in Figure 3a and b.

669



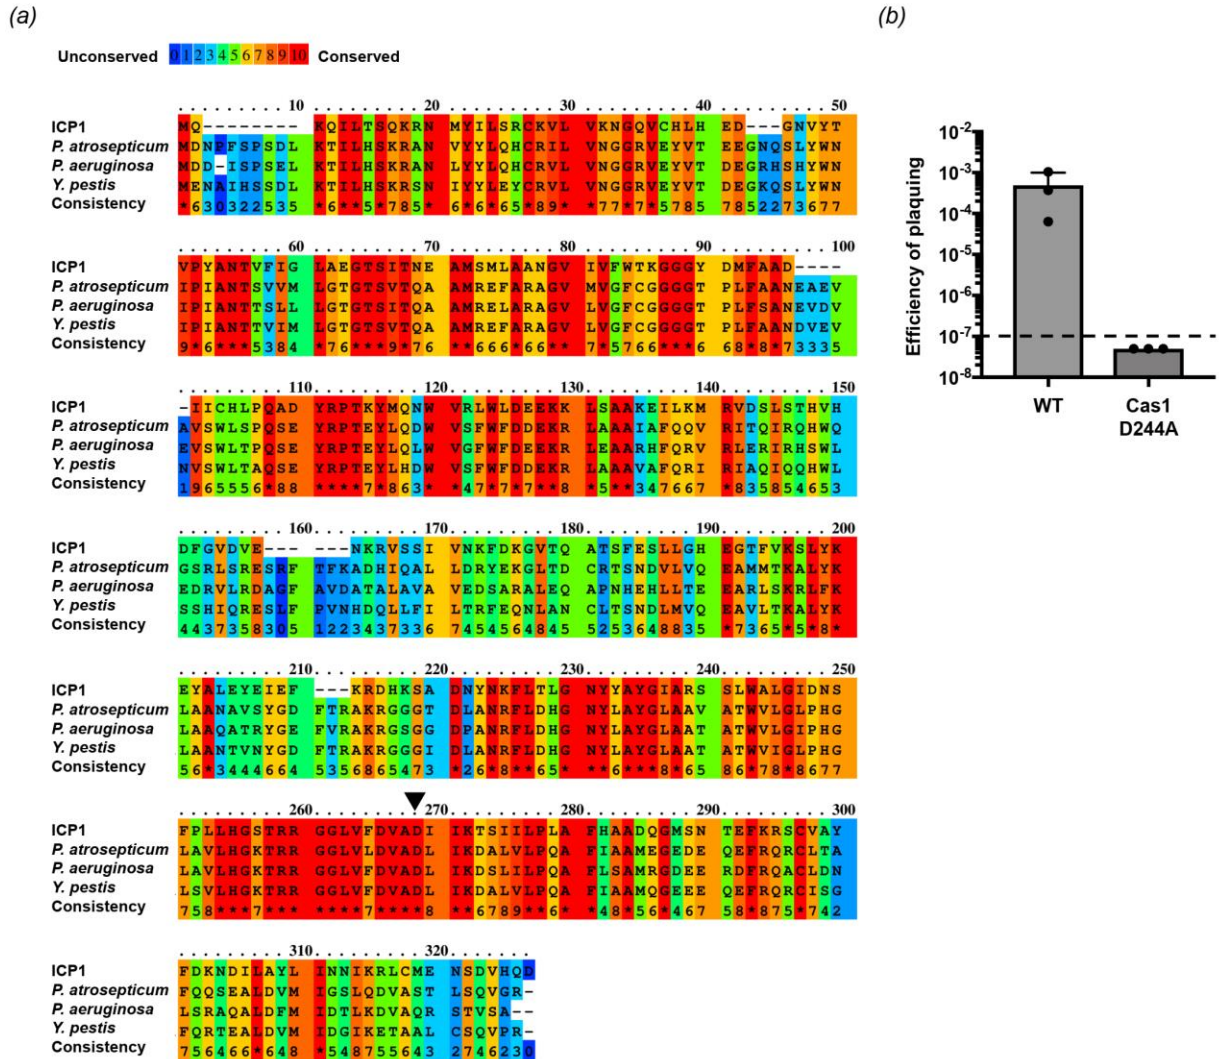

670

671 **Supplementary Figure 3. Conserved residue in Cas1 is necessary for spacer acquisition.**

672 (a) Praline alignment (46) of Cas1 from ICP1 and other Type I-F systems in the organism

673 indicated. Black arrow indicates conserved residue mutated in ICP1. (b) Spacer acquisition was

674 measured by the number of plaques on a PLE(+) host without a protospacer relative to the

675 number of plaques on a PLE(+) host with a functional protospacer. Dashed line indicates level

676 of detection. Error bars indicate standard deviation of three independent replicates.

677

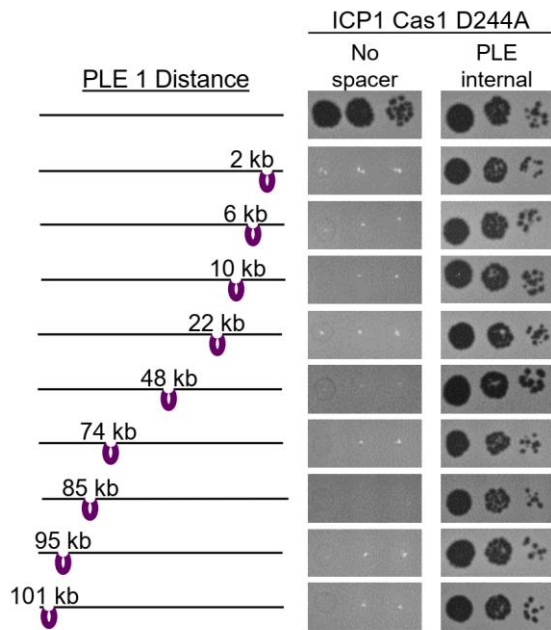

678

679 **Supplementary Figure 4. PLE transduced in unique sites in *V. cholerae* chromosome can**

680 **be overcome by ICP1-CRISPR mediated interference.** Tenfold dilutions ICP1 without any

681 spacer or with a PLE targeting spacer spotted on lawns of *V. cholerae*. Transductants used are

682 the same as in Figure 6c.
